# Supplementary material for: Development and Evaluation of a Multiplex Quantitative Real-Time Polymerase Chain Reaction for Hookworm Species in Human Stool
Source: PubMed Central journal article supplement (PMC6221243; doi:10.4269/ajtmh.18-0276), 2018-09-17
Supplement: tpmd180276.SD1.pdf [file tpmd180276.SD1.pdf]

```

A_ceylanicum_DQ780009      -----CGTGCTAGTCTTCAGGACTTTGTCGGG-AAGGTTGG
A_caninum_JQ812694        TCCTGAGAAACCAACGTGCTAGTCTTCACGACTTTGTCGGGGAAGGTTGG
A_duodenale_EU344797      TCCTGAGAAACCAACGTGCTAGTCTTCACGACTTTGTCGGG-AAGGTTGG
                               *****
A_ceylanicum_DQ780009      GAGTATCGCCCCCGTTACAGCCCTACGTGAGGTGTCTATGTGCAGCAAG
A_caninum_JQ812694        GAGTATCGCCACCGTTACAGCCCTATGTAAGGTGTCTATGTGCAGCAAG
A_duodenale_EU344797      GAGTATCGCCCCCGTTATAGCCCTACGTAAGGTGTCTATGTGCAGCAAG
                               *****
A_ceylanicum_DQ780009      AGCCGTTCTGGGTGGCGGCAGTGATTGCTGTGCGAAGTTCCGCGTTTCGC
A_caninum_JQ812694        AGTCGTTACTGGGTGGCGGCAGTGATTGCTGTGCGAAGTTTCGCGTTTCGC
A_duodenale_EU344797      AGTCGTTACTGGGTGACGGCAGTGATTGCTGTGCGAAGTTCCGCGTTTCGC
                               ** ****
A_ceylanicum_DQ780009      TGAGCTTTAGACTTGATGAGCATTGCATGAATGCCGCCTTACTGCTTGTG
A_caninum_JQ812694        TGAGCTTTAGACTTGATGAGCATTGCATGAATGCCGCCTTACTGCTTGTG
A_duodenale_EU344797      TGAGCTTTAGACTTGATGAGCATTGCATGAATGCCGCCTTACTGCTTGTG
                               *****

```

Supplementary Figure 1. DNA sequence alignment of partial internal transcribed-1 spacer region of SSU rRNA gene of *Ancylostoma ceylanicum* (DQ780009), *Ancylostoma caninum* (JQ812694) and *Ancylostoma duodenale* (EU344797) displaying the location of the forward and reverse primers (bolded underline) and probes (double underlined) used in the hookworm real-time PCR.
